# Supplementary material for: Identification of chronological and photoageing-associated microRNAs in human skin
Source: PubMed Central journal article supplement (PMC6113407; doi:10.1038/s41598-018-31217-8), 2018-08-28
Supplement: 41598_2018_31217_MOESM1_ESM.pdf [file 41598_2018_31217_MOESM1_ESM.pdf]

## Identification of chronological and photoageing-associated microRNAs in human skin

Ankit Srivastava<sup>1</sup>, Magnus Karlsson<sup>1 3</sup>, Claire Marionnet<sup>2</sup>, Françoise Bernerd<sup>2</sup>, Audrey Gueniche<sup>2</sup>, Charles El Rawadi<sup>2</sup>, Mona Ståhle<sup>1 3</sup>, Enikő Sonkoly<sup>1 3</sup>, Lionel Breton<sup>2</sup> and Andor Pivarcsi<sup>1\*</sup>

<sup>1</sup>Department of Medicine, Dermatology and Venereology Unit, Karolinska Institutet, Stockholm, Sweden

<sup>2</sup>L'Oréal Research and Innovation, Aulnay-sous-Bois, France

<sup>3</sup>Unit of Dermatology, Karolinska University Hospital, Stockholm, Sweden

**\*Correspondence:** Andor Pivarcsi, Dermatology and Venereology Unit, Department of Medicine Solna, Karolinska Institutet, CMM L8:02, 17176 Stockholm, Sweden.

Phone: +46 8 51772158. E-mail: [andor.pivarcsi@ki.se](mailto:andor.pivarcsi@ki.se)

## Supplementary methods

### Inclusion and exclusion criteria

Women in the Young and Middle age groups had a regular cycle of 28 days under efficient contraception (except donor D43). The women over 70 in the Aged group were menopausal for at least 2 years. All volunteers were Phototypes II to III according to Fitzpatrick classification. Colorimetric measures were performed on cheeks with a Chromameter (Minolta CR400) using L\*a\*b\* color system ("Commission Internationale de l'Eclairage", CIE, 1976). The ITA° angle was calculated according to the following formula:  $ITA^\circ = [\text{ArcTangent}((L^* - 50)/b^*)]180/\pi^1$ . The ITA values were comprised between 33-47 corresponding to Very Light-Light-Intermediate skin color groups <sup>2</sup>. BMI values were  $< 27.0 \text{ Kg.m}^{-2}$ . For each subject, measures of the skin folding grade were performed on the front upper arm using Densiscore® according to the method described in <sup>3</sup>, which consists of compressing the skin horizontally and quantifying the width of the folds generated. The skin folding grade using Densiscore® were  $\leq 2$  for group #1, 3-4 for group #2 and  $\geq 6$  for group #3 which was in agreement with thinner and numerous folds in a young (age group #1) population and wider but fewer folds in an old (age group #3) population. In addition, a photo-ageing score was performed on external arm using a 1-9 photo-ageing photographic scale according to McKenzie et al, score 1 being the lowest photo-ageing grade and score 9 the highest <sup>4</sup>. The mean photo-damage score was 1-3 for the Young group, 4-5 for the Middle age group and 6-8 for the Aged group. Densiscore® grade and photo-aging score allowed us to have volunteers that have biological age close to their age. Immuno-compromised subjects, with a chronic systemic or skin disease as subjects with a history of skin cancer, malignant melanoma were not included in the study. Subjects having exposed themselves to the sun or UV radiation in an excessive way in the previous months were also excluded.

## References

- 1 Chardon, A., Cretois, I. & Hourseau, C. Skin colour typology and suntanning pathways. *Int J Cosm Sc* **13**, 191-208 (1991).
- 2 Del Bino, S. & Bernerd, F. Variations in skin colour and the biological consequences of ultraviolet radiation exposure. *Br. J. Dermatol* **169 Suppl 3**, 33-40 (2013).
- 3 Batisse, D., Bazin, R., Baldeweck, T., Querleux, B. & Leveque, J. L. Influence of age on the wrinkling capacities of skin. *Skin Res. Technol* **8**, 148-154 (2002).
- 4 McKenzie, N. E. *et al.* Development of a photographic scale for consistency and guidance in dermatologic assessment of forearm sun damage. *Arch. Dermatol* **147**, 31-36 (2011).

## **Supplementary figure and table legends**

**Supplementary Figure S1. Identification of differentially expressed miRNAs in photoageing.** miRNA profiling identified deregulated miRNAs in the sun-exposed skin of young (age group #1, 18-25 years) and aged donors (age group #3, >70 years). (a-b) Heatmap and the table displaying the differentially expressed miRNAs in sun-exposed skin of age groups #1 and #3.

**Supplementary Figure S2. Localization of miR-383, miR-145, miR-34a and miR-134 in the skin.** FANTOM5 miRNAs atlas was analyzed for the expression of miR-383, miR-145, miR-34a and miR-134 in fibroblast and keratinocytes. Expression (counts per million) was plotted for these miRNAs in fibroblast and keratinocytes.

**Supplementary Figure S3. Impact of sun-exposure on TP53, TP63, MDM2 and PCNA.** The expression of TP53, TP63, and TP53 target genes MDM2 and PCNA was analyzed in sun-protected (suprapubic) and sun-exposed (lower leg) skin using GTEx portal.

**Supplementary Table S1. Detailed donor information.** Table describing age, elasticity, pigmentation and photoageing of all the volunteers included in the study.

**Supplementary Table S2. Significantly enriched KEGG pathways for the qPCR-validated miRNAs.**

KEGG pathway term enrichment analysis was performed using EnrichR, among the predicted targets of all validated miRNAs. (a-g) All significantly enriched pathways are depicted in the tables.

Supplementary Figure S1.

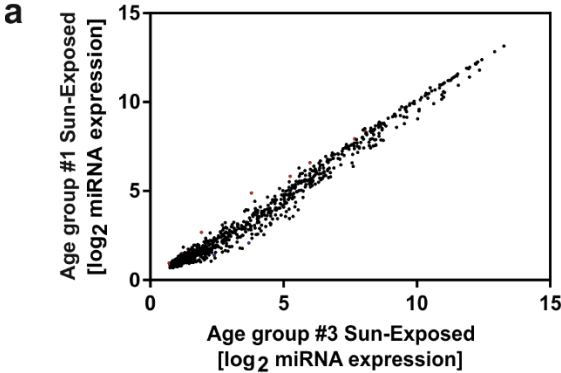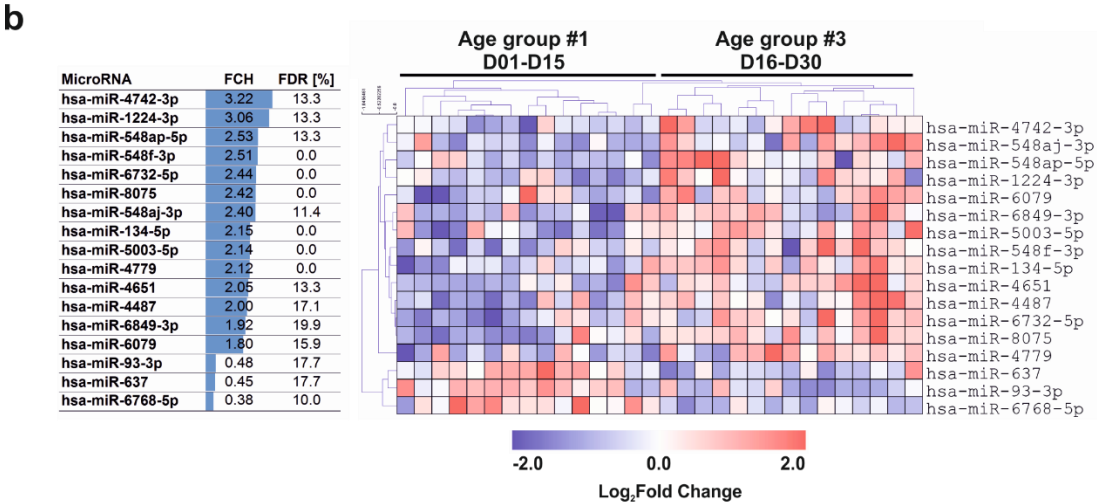

Supplementary Figure S2.

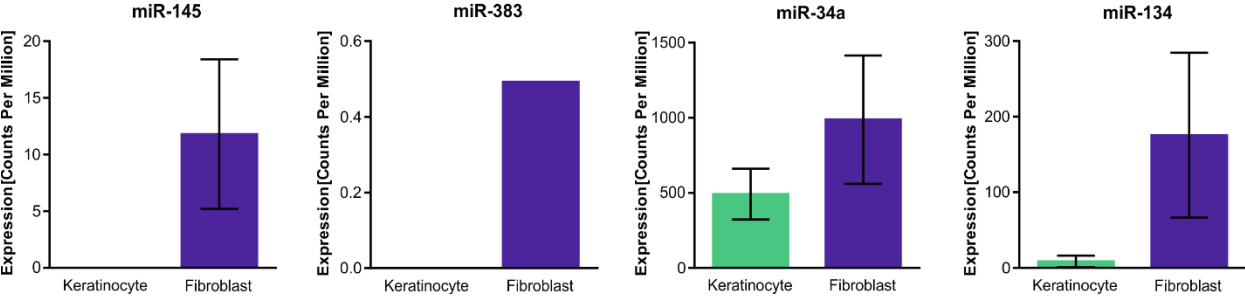

Supplementary Figure S3.

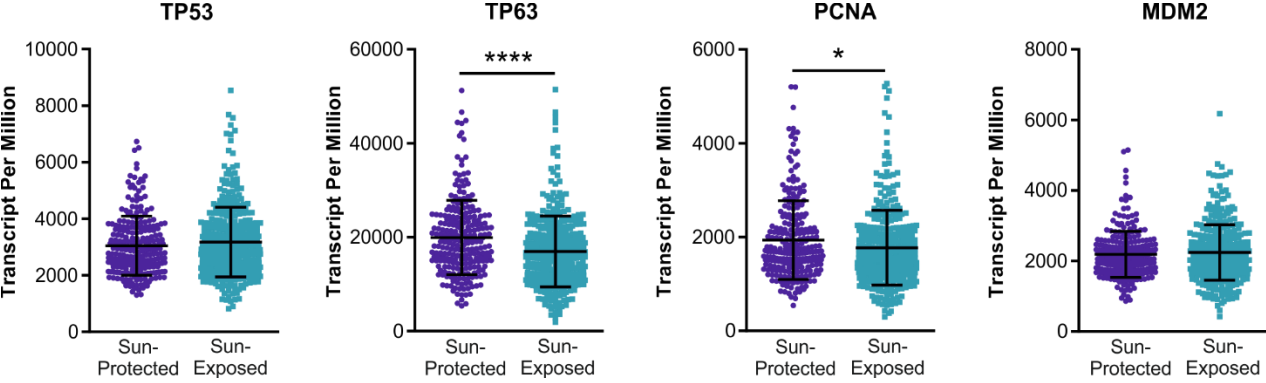

**Supplementary Table S1. Donor information**

| Age group #1   | Age  | ITA  | Skin Fold Score | Photoaging Score | Menopaus |    |
|----------------|------|------|-----------------|------------------|----------|----|
|                | D1   | 21   | 37              | 1                | 1        | no |
|                | D2   | 23   | 41              | 1                | 2        | no |
|                | D3   | 22   | 39              | 1                | 1        | no |
|                | D4   | 23   | 41              | 1                | 1        | no |
|                | D5   | 19   | 40              | 1                | 1        | no |
|                | D6   | 24   | 47              | 1                | 2        | no |
|                | D7   | 19   | 33              | 1                | 1        | no |
|                | D8   | 24   | 37              | 1                | 1        | no |
|                | D9   | 24   | 36              | 1                | 1        | no |
|                | D10  | 23   | 40              | 1                | 1        | no |
|                | D11  | 20   | 39              | 1                | 1        | no |
|                | D12  | 21   | 40              | 1                | 1        | no |
|                | D13  | 22   | 30              | 1                | 1        | no |
|                | D14  | 24   | 36              | 1                | 2        | no |
|                | D15  | 25   | 33              | 1                | 1        | no |
| <b>Average</b> | 22.3 | 37.9 | 1               | 1.2              |          |    |
| <b>SD</b>      | 1.91 | 4.1  |                 | 0.4              |          |    |

| Age group #2   | Age  | ITA  | Skin Fold Score | Photoaging Score | Menopaus |     |
|----------------|------|------|-----------------|------------------|----------|-----|
|                | D31  | 44   | 33              | 3                | 4        | no  |
|                | D32  | 45   | 34              | 3                | 4        | no  |
|                | D33  | 42   | 39              | 3                | 4        | no  |
|                | D34  | 45   | 39              | 3                | 4        | no  |
|                | D35  | 44   | 45              | 3                | 5        | no  |
|                | D36  | 43   | 43              | 3                | 4        | no  |
|                | D37  | 50   | 39              | 3                | 4        | no  |
|                | D38  | 45   | 36              | 3                | 4        | no  |
|                | D39  | 44   | 38              | 3                | 4        | no  |
|                | D40  | 42   | 39              | 3                | 4        | no  |
|                | D41  | 43   | 38              | 3                | 5        | no  |
|                | D42  | 40   | 33              | 3                | 4        | no  |
|                | D43  | 50   | 36              | 3                | 4        | yes |
|                | D44  | 45   | 40              | 3                | 5        | no  |
|                | D45  | 45   | 36              | 3                | 4        | no  |
| <b>Average</b> | 44.5 | 37.9 | 3               | 4.2              |          |     |
| <b>SD</b>      | 2.67 | 3.38 |                 | 0.4              |          |     |



| Age group #3   | Age  | ITA  | Skin Fold Score | Photoaging Score | Menopaus |     |
|----------------|------|------|-----------------|------------------|----------|-----|
|                | D16  | 78   | 37              | >6               | 6        | yes |
|                | D17  | 75   | 37              | >6               | 6        | yes |
|                | D18  | 81   | 38              | >6               | 6        | yes |
|                | D19  | 76   | 36              | >6               | 6        | yes |
|                | D20  | 71   | 38              | >6               | 6        | yes |
|                | D21  | 76   | 37              | >6               | 6        | yes |
|                | D22  | 77   | 38              | >6               | 6        | yes |
|                | D23  | 76   | 40              | >6               | 7        | yes |
|                | D24  | 71   | 38              | >6               | 6        | yes |
|                | D25  | 71   | 41              | >6               | 6        | yes |
|                | D26  | 71   | 42              | >6               | 7        | yes |
|                | D27  | 70   | 37              | >6               | 6        | yes |
|                | D28  | 72   | 37              | >6               | 6        | yes |
|                | D29  | 79   | 40              | >6               | 7        | yes |
|                | D30  | 70   | 31              | >6               | 6        | yes |
| <b>Average</b> | 74.3 | 37.8 | >6              | 6.2              |          |     |
| <b>SD</b>      | 3.61 | 2.54 |                 | 0.4              |          |     |

## Supplementary Table S2. KEGG pathway enrichment

### a. Significantly enriched KEGG pathways among the predicted targets of miR-145

| Term                                                                                    | P-value | Z-score |
|-----------------------------------------------------------------------------------------|---------|---------|
| <i>Vibrio cholerae</i> infection_Homo sapiens_hsa05110                                  | 0.004   | -1.88   |
| Hypertrophic cardiomyopathy (HCM)_Homo sapiens_hsa05410                                 | 0.003   | -1.82   |
| Bacterial invasion of epithelial cells_Homo sapiens_hsa05100                            | 0.003   | -1.79   |
| Dilated cardiomyopathy_Homo sapiens_hsa05414                                            | 0.005   | -1.78   |
| Axon guidance_Homo sapiens_hsa04360                                                     | 0.004   | -1.70   |
| Proteoglycans in cancer_Homo sapiens_hsa05205                                           | 0.010   | -1.83   |
| MAPK signaling pathway_Homo sapiens_hsa04010                                            | 0.011   | -1.79   |
| Oxytocin signaling pathway_Homo sapiens_hsa04921                                        | 0.011   | -1.74   |
| Hippo signaling pathway_Homo sapiens_hsa04390                                           | 0.010   | -1.59   |
| Shigellosis_Homo sapiens_hsa05131                                                       | 0.008   | -1.56   |
| TGF-beta signaling pathway_Homo sapiens_hsa04350                                        | 0.019   | -1.57   |
| Tight junction_Homo sapiens_hsa04530                                                    | 0.025   | -1.44   |
| Endocytosis_Homo sapiens_hsa04144                                                       | 0.034   | -1.62   |
| Focal adhesion_Homo sapiens_hsa04510                                                    | 0.033   | -1.60   |
| Glutathione metabolism_Homo sapiens_hsa00480                                            | 0.025   | -1.34   |
| Rap1 signaling pathway_Homo sapiens_hsa04015                                            | 0.039   | -1.56   |
| Regulation of actin cytoskeleton_Homo sapiens_hsa04810                                  | 0.041   | -1.50   |
| VEGF signaling pathway_Homo sapiens_hsa04370                                            | 0.037   | -1.45   |
| Serotonergic synapse_Homo sapiens_hsa04726                                              | 0.045   | -1.39   |
| Epithelial cell signaling in <i>Helicobacter pylori</i> infection_Homo sapiens_hsa05120 | 0.049   | -1.25   |

### b. Significantly enriched KEGG pathways among the predicted targets of miR-6879

| Term                                                            | P-value | Z-score |
|-----------------------------------------------------------------|---------|---------|
| Inflammatory bowel disease (IBD)_Homo sapiens_hsa05321          | 0.019   | -1.98   |
| Non-alcoholic fatty liver disease (NAFLD)_Homo sapiens_hsa04932 | 0.040   | -1.81   |
| Adherens junction_Homo sapiens_hsa04520                         | 0.026   | -1.77   |
| PPAR signaling pathway_Homo sapiens_hsa03320                    | 0.022   | -1.66   |
| alpha-Linolenic acid metabolism_Homo sapiens_hsa00592           | 0.021   | -1.61   |
| SNARE interactions in vesicular transport_Homo sapiens_hsa04130 | 0.036   | -1.55   |
| Asthma_Homo sapiens_hsa05310                                    | 0.031   | -1.38   |

**c. Significantly enriched KEGG pathways among the predicted targets of miR-663b**

| <b>Term</b>                                                                           | <b>P-value</b> | <b>Z-score</b> |
|---------------------------------------------------------------------------------------|----------------|----------------|
| <i>Retinol metabolism_Homo sapiens_hsa00830</i>                                       | 0.004          | -1.85          |
| <i>Viral carcinogenesis_Homo sapiens_hsa05203</i>                                     | 0.014          | -1.93          |
| <i>Systemic lupus erythematosus_Homo sapiens_hsa05322</i>                             | 0.010          | -1.72          |
| <i>HTLV-I infection_Homo sapiens_hsa05166</i>                                         | 0.038          | -1.84          |
| <i>Alcoholism_Homo sapiens_hsa05034</i>                                               | 0.030          | -1.83          |
| <i>Signaling pathways regulating pluripotency of stem cells_Homo sapiens_hsa04550</i> | 0.049          | -1.68          |
| <i>Cell adhesion molecules (CAMs)_Homo sapiens_hsa04514</i>                           | 0.049          | -1.61          |

**d. Significantly enriched KEGG pathways among the predicted targets of miR-3648**

| <b>Term</b>                                                        | <b>P-value</b> | <b>Z-score</b> |
|--------------------------------------------------------------------|----------------|----------------|
| <i>Viral carcinogenesis_Homo sapiens_hsa05203</i>                  | 0.020          | -1.982         |
| <i>Hepatitis C_Homo sapiens_hsa05160</i>                           | 0.029          | -1.812         |
| <i>Systemic lupus erythematosus_Homo sapiens_hsa05322</i>          | 0.030          | -1.697         |
| <i>Cytosolic DNA-sensing pathway_Homo sapiens_hsa04623</i>         | 0.041          | -1.627         |
| <i>Shigellosis_Homo sapiens_hsa05131</i>                           | 0.042          | -1.599         |
| <i>RIG-I-like receptor signaling pathway_Homo sapiens_hsa04622</i> | 0.048          | -1.564         |

**e. Significantly enriched KEGG pathways among the predicted targets of miR-383**

| <b>Term</b>                                                              | <b>P-value</b> | <b>Z-score</b> |
|--------------------------------------------------------------------------|----------------|----------------|
| <i>Prolactin signaling pathway_Homo sapiens_hsa04917</i>                 | 0.006          | -1.98          |
| <i>Apoptosis_Homo sapiens_hsa04210</i>                                   | 0.013          | -1.91          |
| <i>RNA degradation_Homo sapiens_hsa03018</i>                             | 0.008          | -1.84          |
| <i>Renal cell carcinoma_Homo sapiens_hsa05211</i>                        | 0.029          | -1.78          |
| <i>Protein processing in endoplasmic reticulum_Homo sapiens_hsa04141</i> | 0.027          | -1.74          |
| <i>AMPK signaling pathway_Homo sapiens_hsa04152</i>                      | 0.036          | -1.61          |
| <i>p53 signaling pathway_Homo sapiens_hsa04115</i>                       | 0.033          | -1.60          |
| <i>Biosynthesis of amino acids_Homo sapiens_hsa01230</i>                 | 0.039          | -1.48          |
| <i>FoxO signaling pathway_Homo sapiens_hsa04068</i>                      | 0.044          | -1.57          |
| <i>Circadian rhythm_Homo sapiens_hsa04710</i>                            | 0.038          | -1.34          |
| <i>Glyoxylate and dicarboxylate metabolism_Homo sapiens_hsa00630</i>     | 0.034          | -1.18          |

**f. Significantly enriched KEGG pathways among the predicted targets of miR-34a**

| <b>Term</b>                                                                         | <b>P-value</b> | <b>Z-score</b> |
|-------------------------------------------------------------------------------------|----------------|----------------|
| <i>Adherens junction_Homo sapiens_hsa04520</i>                                      | 0.001          | -1.84          |
| <i>Other types of O-glycan biosynthesis_Homo sapiens_hsa00514</i>                   | 0.000          | -1.59          |
| <i>Galactose metabolism_Homo sapiens_hsa00052</i>                                   | 0.004          | -1.56          |
| <i>MAPK signaling pathway_Homo sapiens_hsa04010</i>                                 | 0.012          | -1.90          |
| <i>Bacterial invasion of epithelial cells_Homo sapiens_hsa05100</i>                 | 0.008          | -1.70          |
| <i>Notch signaling pathway_Homo sapiens_hsa04330</i>                                | 0.013          | -1.54          |
| <i>Retrograde endocannabinoid signaling_Homo sapiens_hsa04723</i>                   | 0.018          | -1.77          |
| <i>Arrhythmogenic right ventricular cardiomyopathy (ARVC)_Homo sapiens_hsa05412</i> | 0.037          | -1.58          |
| <i>Hypertrophic cardiomyopathy (HCM)_Homo sapiens_hsa05410</i>                      | 0.049          | -1.56          |
| <i>Cardiac muscle contraction_Homo sapiens_hsa04260</i>                             | 0.043          | -1.54          |

**g. Significantly enriched KEGG pathways among the predicted targets of miR-134**

| <b>Term</b>                                                                      | <b>P-value</b> | <b>Z-score</b> |
|----------------------------------------------------------------------------------|----------------|----------------|
| <i>Biosynthesis of amino acids_Homo sapiens_hsa01230</i>                         | 0.001          | -1.772         |
| <i>Viral carcinogenesis_Homo sapiens_hsa05203</i>                                | 0.002          | -1.957         |
| <i>Hepatitis B_Homo sapiens_hsa05161</i>                                         | 0.005          | -1.885         |
| <i>Alanine, aspartate and glutamate metabolism_Homo sapiens_hsa00250</i>         | 0.007          | -1.617         |
| <i>Ubiquinone and other terpenoid-quinone biosynthesis_Homo sapiens_hsa00130</i> | 0.008          | -0.677         |
| <i>Regulation of actin cytoskeleton_Homo sapiens_hsa04810</i>                    | 0.008          | -1.797         |
| <i>Toxoplasmosis_Homo sapiens_hsa05145</i>                                       | 0.009          | -1.764         |
| <i>Neurotrophin signaling pathway_Homo sapiens_hsa04722</i>                      | 0.010          | -1.699         |
| <i>Cysteine and methionine metabolism_Homo sapiens_hsa00270</i>                  | 0.014          | -1.489         |
| <i>ErbB signaling pathway_Homo sapiens_hsa04012</i>                              | 0.015          | -1.633         |
| <i>Nitrogen metabolism_Homo sapiens_hsa00910</i>                                 | 0.016          | -0.439         |
| <i>NF-kappa B signaling pathway_Homo sapiens_hsa04064</i>                        | 0.018          | -1.454         |
| <i>Longevity regulating pathway - mammal_Homo sapiens_hsa04211</i>               | 0.019          | -1.574         |
| <i>Epstein-Barr virus infection_Homo sapiens_hsa05169</i>                        | 0.021          | -1.627         |
| <i>Arginine biosynthesis_Homo sapiens_hsa00220</i>                               | 0.022          | -0.397         |
| <i>Estrogen signaling pathway_Homo sapiens_hsa04915</i>                          | 0.022          | -1.502         |
| <i>Non-small cell lung cancer_Homo sapiens_hsa05223</i>                          | 0.023          | -1.428         |
| <i>Acute myeloid leukemia_Homo sapiens_hsa05221</i>                              | 0.024          | -1.341         |
| <i>Chagas disease (American trypanosomiasis)_Homo sapiens_hsa05142</i>           | 0.026          | -1.344         |
| <i>Toll-like receptor signaling pathway_Homo sapiens_hsa04620</i>                | 0.028          | -1.386         |
| <i>Proximal tubule bicarbonate reclamation_Homo sapiens_hsa04964</i>             | 0.028          | -0.105         |
| <i>Insulin resistance_Homo sapiens_hsa04931</i>                                  | 0.030          | -1.305         |
| <i>Colorectal cancer_Homo sapiens_hsa05210</i>                                   | 0.030          | -1.138         |
| <i>TNF signaling pathway_Homo sapiens_hsa04668</i>                               | 0.031          | -1.295         |

|                                                                       |       |        |
|-----------------------------------------------------------------------|-------|--------|
| Cholinergic synapse_Homo sapiens_hsa04725                             | 0.032 | -1.376 |
| Longevity regulating pathway - multiple species_Homo sapiens_hsa04213 | 0.033 | -1.069 |
| cGMP-PKG signaling pathway_Homo sapiens_hsa04022                      | 0.033 | -1.267 |
| Pancreatic cancer_Homo sapiens_hsa05212                               | 0.035 | -0.976 |
| Renal cell carcinoma_Homo sapiens_hsa05211                            | 0.035 | -0.953 |
| Thyroid cancer_Homo sapiens_hsa05216                                  | 0.041 | -0.068 |
| Alcoholism_Homo sapiens_hsa05034                                      | 0.043 | -1.151 |
| Prolactin signaling pathway_Homo sapiens_hsa04917                     | 0.043 | -0.926 |
| Chronic myeloid leukemia_Homo sapiens_hsa05220                        | 0.045 | -0.890 |
| Axon guidance_Homo sapiens_hsa04360                                   | 0.048 | -0.929 |

---
